# Supplementary material
Source: MDPI journal article supplement (https://www.mdpi.com/2220-9964/10/6/365)
Supplement: s1 [file s1 › ijgi-1184178-supplementary.pdf]

# Supplementary Materials: Pedestrian Routing and Perspectives: WayFinder's Route Down the Lane—Come on with the Rain

Tables S1–S3 below summarize the three questionnaires used in the empirical part of the study.

**Table S1.** Questions included in the background questionnaire (Q1–BQ).

| # | Question                                                                           | Answers                        | Abbreviation of the question                                             |
|---|------------------------------------------------------------------------------------|--------------------------------|--------------------------------------------------------------------------|
| 1 | On a scale of 1–7, rate your proficiency in the use of maps for city walks         | From 1 (poor) to 7 (very good) | Skill 1.<br>Proficiency in the use of maps for city walks                |
| 2 | On a scale of 1–7, rate your skills in spatial orientation in the urban space      | From 1 (poor) to 7 (very good) | Skill 2.<br>Spatial orientation in the urban space                       |
| 3 | On a scale of 1–7, rate your acquaintance with the city of Trondheim               | From 1 (poor) to 7 (very good) | Acquaintance 1.<br>Acquaintance with the city of Trondheim               |
| 4 | On a scale of 1–7, rate your acquaintance with the weather conditions in Trondheim | From 1 (poor) to 7 (very good) | Acquaintance 2.<br>Acquaintance with the weather conditions in Trondheim |

**Table S2.** Questions included in the post-walk questionnaire (Q2–QW).

| # | Question                                                                                      | Answers                                                                                                                                                                                                                                                                                                          | Abbreviation of the question |
|---|-----------------------------------------------------------------------------------------------|------------------------------------------------------------------------------------------------------------------------------------------------------------------------------------------------------------------------------------------------------------------------------------------------------------------|------------------------------|
| 1 | Did you follow one of routes suggested in the WayFinder web application?                      | “yes” or “no”<br>(if “no”, explain why by selecting one of the five predefined answers: “I did not have Internet connection,” “I did not know how to use the tool,” “Due to technical problems, no routing suggestions were provided,” “Provided routing suggestions did not make sense to me,” “Other reasons”) | –                            |
| 2 | Which route suggestion did you follow?                                                        | One of the five predefined answers with route codes                                                                                                                                                                                                                                                              | –                            |
| 3 | What was your path choice?                                                                    | One of the four predefined questions: “Route with the shortest parts passing through blue spots,” “Shortest route,” “Route avoiding blue spots,” “Other choice”                                                                                                                                                  | –                            |
| 4 | On a scale of 1–7, rate the completeness of the blue spot mapping used in the WayFinder tool. | From 1 (very incomplete) to 7 (very complete)                                                                                                                                                                                                                                                                    | –                            |
| 5 | How many inundated areas not included in the tool’s blue spot mapping did you observe?        | 0 and more                                                                                                                                                                                                                                                                                                       | –                            |

**Table S3.** Questions included in the summary questionnaire (Q3-SQ).

| # | Question                                                                        | Answers                                                                                                                                                                                                                                        | Abbreviation of the question                                |
|---|---------------------------------------------------------------------------------|------------------------------------------------------------------------------------------------------------------------------------------------------------------------------------------------------------------------------------------------|-------------------------------------------------------------|
| 1 | On a scale of 1-7, how useful did you find the WayFinder web application to be? | From 1 (low usefulness) to 7 (high usefulness)                                                                                                                                                                                                 | Assessment 1.<br>Usefulness of the WayFinder tool           |
| 2 | Who do you think would be interested in using the WayFinder web application?    | One or more of the following predefined answers: "All pedestrians," "Tourists," "Recently moved in," "Wheelchair users," "Elderly people," "Parents with young children in prams or strollers," "Students," "Children," "Cyclists," "Drivers." | –                                                           |
| 3 | On a scale of 1-7, rate your satisfaction when using the WayFinder tool.        | From 1 (low satisfaction) to 7 (high satisfaction)                                                                                                                                                                                             | Assessment 2.<br>Satisfaction when using the WayFinder tool |
| 4 | On a scale of 1-7, how would you rate the functionality of the WayFinder tool?  | From 1 (low functionality) to 7 (high functionality)                                                                                                                                                                                           | Assessment 3.<br>Functionality of the WayFinder tool        |
